# Supplementary material
Source: PubMed Central journal article supplement (PMC6474419)
Supplement: NIHMS1515954-supplement-4.pdf [file NIHMS1515954-supplement-4.pdf]

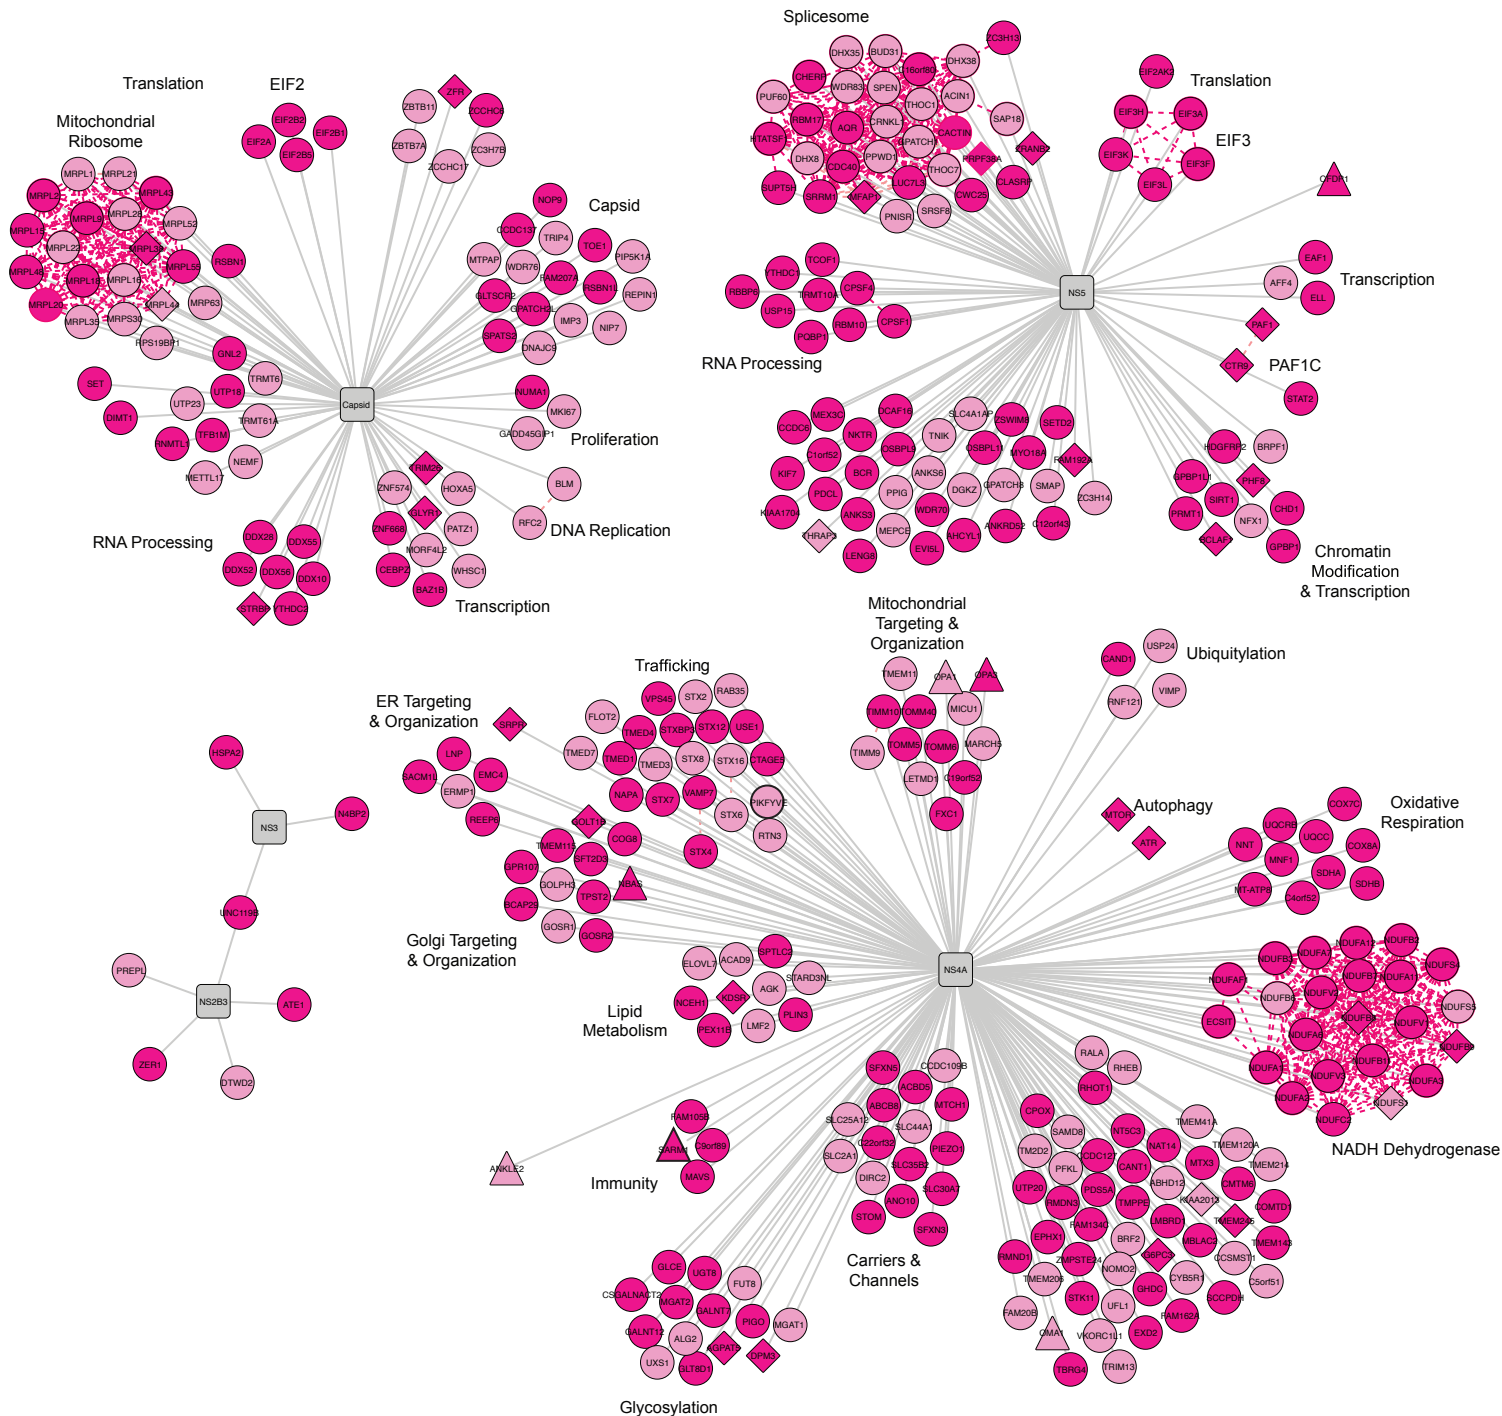

ZIKV protein  
 Human protein

- - - Published host-host protein interaction (587)  
— ZIKVfp-host protein interaction (368)

◆ DENV overlap (28)  
● ZIKVug overlap (254)  
▲ Neurodevelopment (7)
