# Supplementary material
Source: PubMed Central journal article supplement (PMC6474419)

### Golgi

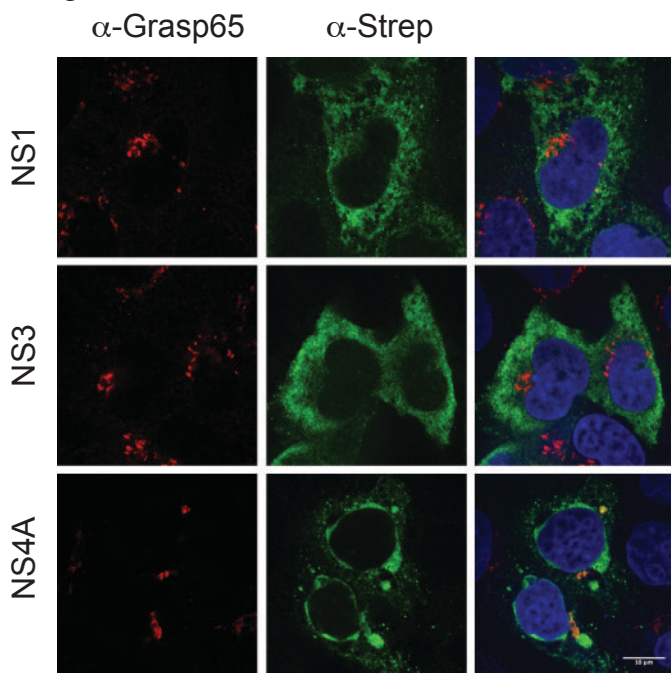

### Mitochondria

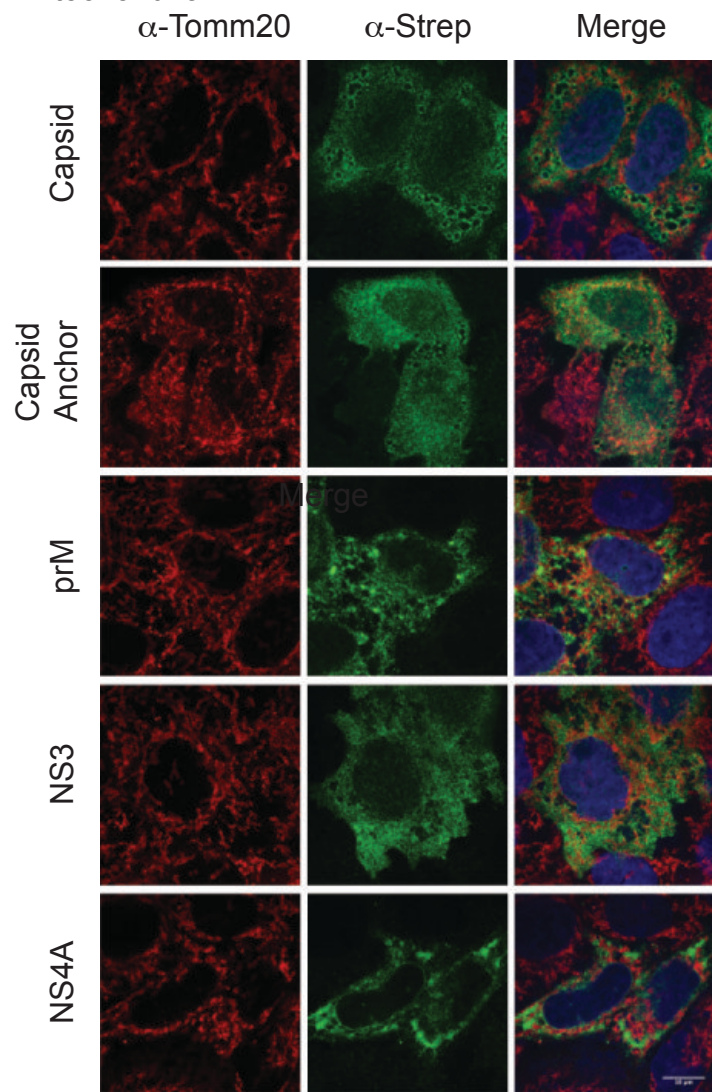

### Lipid Droplets

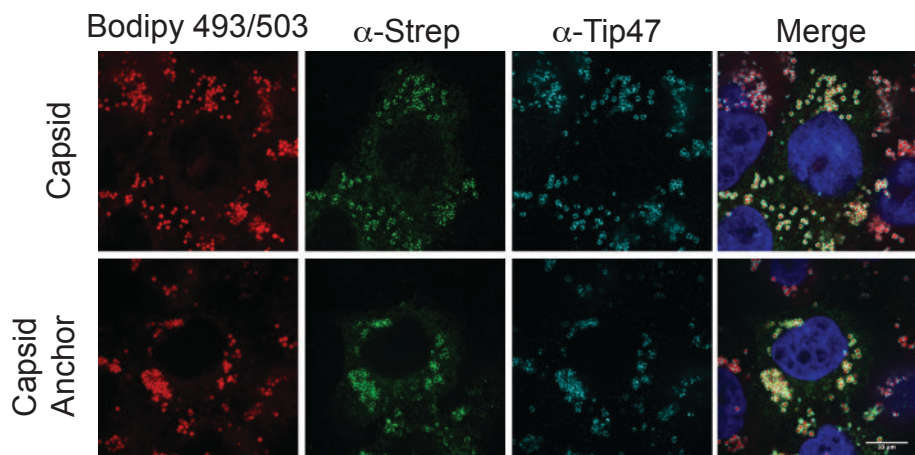

Supplement: NIHMS1515954-supplement-3.pdf [file NIHMS1515954-supplement-3.pdf]

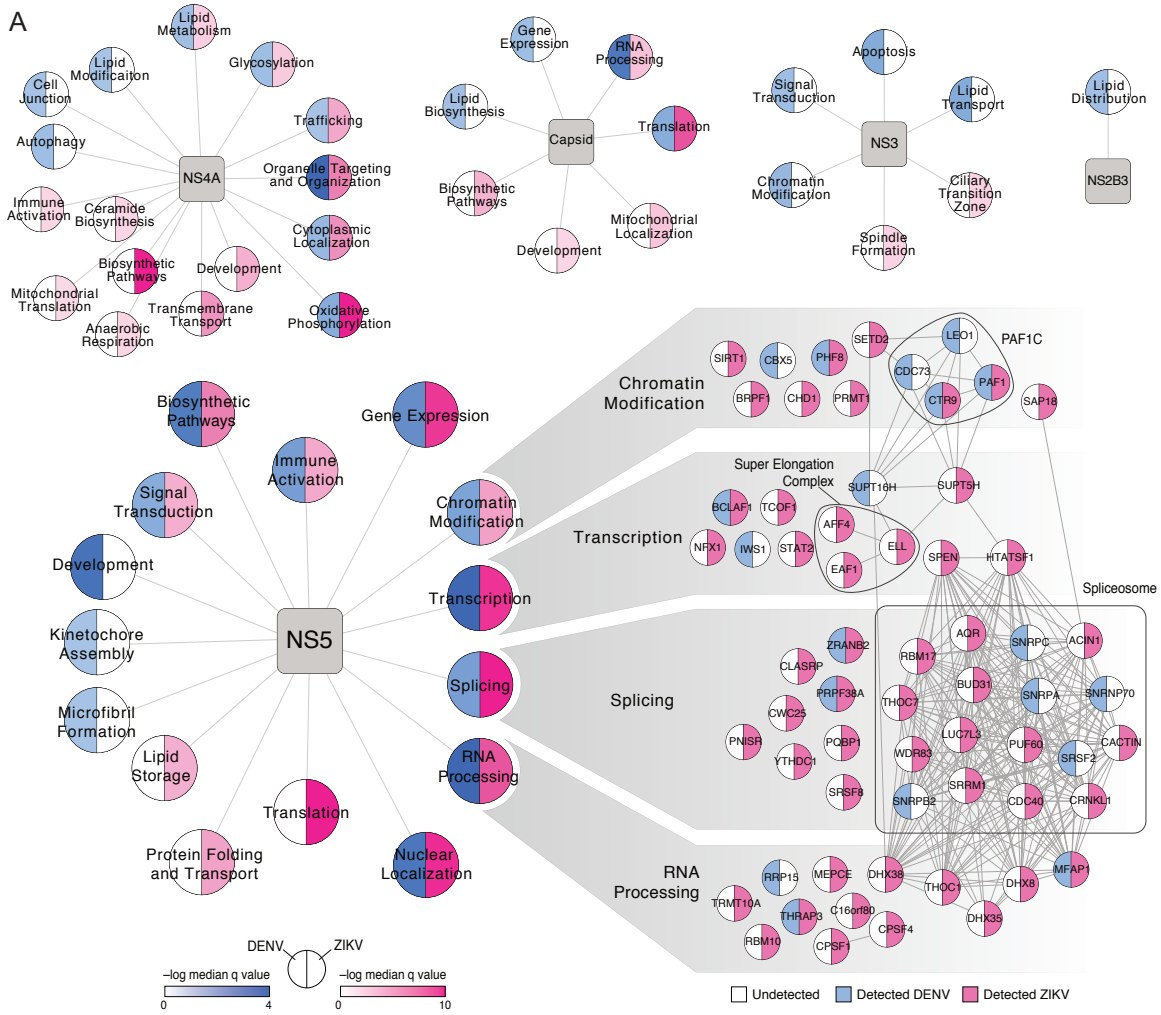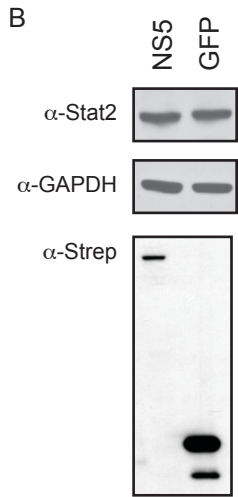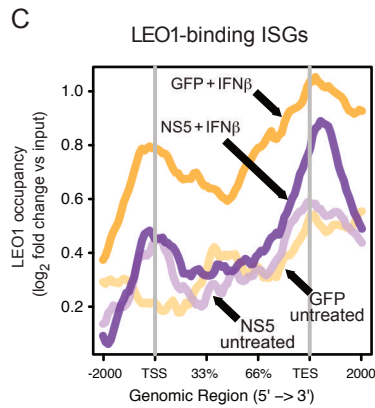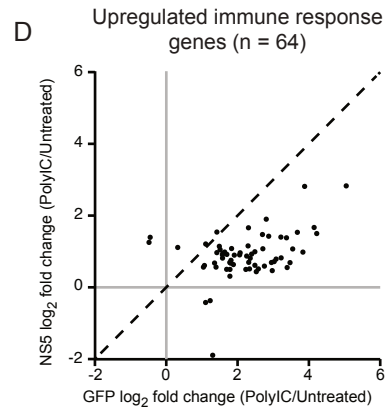

Supplement: NIHMS1515954-supplement-5.pdf [file NIHMS1515954-supplement-5.pdf]
